# Supplementary material for: Quorum Quenching Properties and Probiotic Potentials of Intestinal Associated Bacteria in Asian Sea Bass Lates calcarifer
Source: PubMed Central journal article supplement (PMC7024293; doi:10.3390/md18010023), 2019-12-26
Supplement: marinedrugs-18-00023-s001.pdf [file marinedrugs-18-00023-s001.pdf]

1 Supplementary Materials:

2 **Quorum quenching properties and probiotic**  
3 **potentials of intestinal associated bacteria in Asian**  
4 **sea bass *Lates calcarifer***

5 **Reza Ghanei-Motlagh** <sup>1,3</sup>, **Takavar Mohammadian** <sup>1,\*</sup>, **Dariush Gharibi** <sup>2</sup>, **Simon Menanteau-**  
6 **Ledouble** <sup>3,\*</sup>, **Esmail Mahmoudi** <sup>4</sup>, **Mohammad Khosravi** <sup>2</sup>, **Mojtaba Zarea** <sup>1</sup> and **Mansour El-**  
7 **Matbouli** <sup>3</sup>

8 <sup>1</sup> Department of Clinical Sciences, Faculty of Veterinary Medicine, Shahid Chamran University of Ahvaz,  
9 Ahvaz, Iran

10 <sup>2</sup> Department of Pathobiology, Faculty of Veterinary Medicine, Shahid Chamran University of Ahvaz,  
11 Ahvaz, Iran

12 <sup>3</sup> Clinical Division of Fish Medicine, University of Veterinary Medicine, Vienna, Austria

13 <sup>4</sup> Department of Plant Protection, Faculty of Agriculture, Isfahan (Khorasgan) Branch, Islamic Azad  
14 University, Isfahan, Iran

15 \* Correspondence: t.mohammadian@scu.ac.ir (T.M.); Simon.Menanteau-Ledouble@vetmeduni.ac.at (S.M.-L.)

16  
17  
18  
19  
20

21 **Supplementary Table S1.** Resistance of quorum quenching bacteria to bile salts.

| Isolates | Bile concentration       |                          |                          | Total score |
|----------|--------------------------|--------------------------|--------------------------|-------------|
|          | 2.5%                     | 5%                       | 7.5%                     |             |
| QQ1      | 8.00 ± 0.01 <sup>a</sup> | 7.97 ± 0.01 <sup>a</sup> | 7.90 ± 0.01 <sup>a</sup> | 12          |
| QQ2      | 7.97 ± 0.04 <sup>a</sup> | 7.96 ± 0.02 <sup>a</sup> | 7.94 ± 0.03 <sup>a</sup> | 12          |
| QQ3      | 7.88 ± 0.02 <sup>b</sup> | 7.85 ± 0.01 <sup>b</sup> | 7.74 ± 0.01 <sup>b</sup> | 9           |
| QQ4      | 7.97 ± 0.01 <sup>a</sup> | 7.94 ± 0.01 <sup>a</sup> | 7.92 ± 0.02 <sup>a</sup> | 12          |
| QQ5      | 7.97 ± 0.02 <sup>a</sup> | 7.94 ± 0.01 <sup>a</sup> | 7.91 ± 0.02 <sup>a</sup> | 12          |

22 Data are expressed as log cfu/ml (Mean ± SD) (n=3). Different superscript letters in each column  
 23 indicate statically significant differences between values (P < 0.05). The values were rated as: a (4), b  
 24 (3)

25

26

27

28 **Supplementary Table S2.** Survival of quorum quenching bacteria in various degrees of pH.

| Isolates | pH                       |                          |                          |                           |                          | Total score |
|----------|--------------------------|--------------------------|--------------------------|---------------------------|--------------------------|-------------|
|          | 1.5                      | 3                        | 4.5                      | 7                         | 9                        |             |
| QQ1      | 7.66 ± 0.05 <sup>a</sup> | 7.85 ± 0.01 <sup>a</sup> | 7.96 ± 0.01 <sup>a</sup> | 8.05 ± 0.02 <sup>a</sup>  | 8.01 ± 0.02 <sup>a</sup> | 20          |
| QQ2      | 7.64 ± 0.01 <sup>a</sup> | 7.86 ± 0.01 <sup>a</sup> | 7.96 ± 0.01 <sup>a</sup> | 7.98 ± 0.03 <sup>b</sup>  | 7.98 ± 0.03 <sup>a</sup> | 19          |
| QQ3      | 7.31 ± 0.06 <sup>b</sup> | 7.77 ± 0.04 <sup>b</sup> | 7.87 ± 0.03 <sup>b</sup> | 7.89 ± 0.01 <sup>c</sup>  | 7.89 ± 0.01 <sup>b</sup> | 14          |
| QQ4      | 7.67 ± 0.02 <sup>a</sup> | 7.87 ± 0.02 <sup>a</sup> | 7.97 ± 0.02 <sup>a</sup> | 7.98 ± 0.03 <sup>b</sup>  | 7.96 ± 0.02 <sup>a</sup> | 19          |
| QQ5      | ND                       | ND                       | 7.68 ± 0.02 <sup>c</sup> | 8.01 ± 0.03 <sup>ab</sup> | 8.00 ± 0.02 <sup>a</sup> | 9.5         |

29 Data represent the log cfu/ml (Mean ± SD) of three replicates. A different superscript within the  
 30 same column indicates significant difference among values (P < 0.05). The values were rated as  
 31 follow: a (4), ab (3.5), b (3), bc (2.5), c (2) Not detected (ND).

32

33

34

35 **Supplementary Table S3.** Growth of quorum quenching bacteria in different salinities.

| Isolates | Salinity (OD)             |                           |                            |                           | Total score |
|----------|---------------------------|---------------------------|----------------------------|---------------------------|-------------|
|          | 0%                        | 2%                        | 4%                         | 8%                        |             |
| QQ1      | 0.456 ± 0.01 <sup>b</sup> | 0.517 ± 0.01 <sup>c</sup> | 0.362 ± 0.01 <sup>b</sup>  | 0.181 ± 0.01 <sup>a</sup> | 12          |
| QQ2      | 0.428 ± 0.01 <sup>b</sup> | 0.690 ± 0.01 <sup>a</sup> | 0.333 ± 0.01 <sup>c</sup>  | 0.130 ± 0.01 <sup>b</sup> | 12          |
| QQ3      | 0.215 ± 0.01 <sup>d</sup> | 0.346 ± 0.01 <sup>e</sup> | 0.328 ± 0.01 <sup>cd</sup> | 0.079 ± 0.01 <sup>c</sup> | 4.5         |
| QQ4      | 0.381 ± 0.01 <sup>c</sup> | 0.458 ± 0.01 <sup>d</sup> | 0.307 ± 0.01 <sup>d</sup>  | 0.120 ± 0.01 <sup>b</sup> | 5           |
| QQ5      | 0.620 ± 0.01 <sup>a</sup> | 0.541 ± 0.01 <sup>b</sup> | 0.487 ± 0.01 <sup>a</sup>  | 0.115 ± 0.01 <sup>b</sup> | 14          |

36 Values (Mean ± SD, n=3) with various lowercase letters in a column indicate significant differences  
 37 (P < 0.05). The data were scored as: a (4), ab (3.5), b (3), bc (2.5), c (2), cd (1.5), d (1), de (0.5), e (0).

38

39

40

41

42 **Supplementary Table S4.** Co-aggregation percentage of quorum quenching bacteria.

| Isolates | Coaggregation (%)          |                           |                             |                           | Total score |
|----------|----------------------------|---------------------------|-----------------------------|---------------------------|-------------|
|          | <i>Vibrio harveyi</i>      |                           | <i>Vibrio alginolyticus</i> |                           |             |
|          | 2 h                        | 24 h                      | 2 h                         | 24 h                      |             |
| QQ1      | 11.74 ± 2.00 <sup>bc</sup> | 33.66 ± 1.82 <sup>a</sup> | 22.25 ± 3.25 <sup>b</sup>   | 41.34 ± 1.95 <sup>b</sup> | 12.5        |
| QQ2      | 16.91 ± 0.72 <sup>a</sup>  | 23.59 ± 1.75 <sup>b</sup> | 30.58 ± 2.98 <sup>a</sup>   | 52.71 ± 3.13 <sup>a</sup> | 15          |
| QQ3      | 13.17 ± 0.33 <sup>ab</sup> | 23.62 ± 1.18 <sup>b</sup> | 16.59 ± 1.18 <sup>bc</sup>  | 37.26 ± 1.60 <sup>b</sup> | 12          |
| QQ4      | 15.88 ± 2.10 <sup>a</sup>  | 24.87 ± 1.83 <sup>b</sup> | 21.20 ± 0.40 <sup>b</sup>   | 36.58 ± 0.96 <sup>b</sup> | 13          |
| QQ5      | 8.40 ± 1.26 <sup>c</sup>   | 16.77 ± 1.48 <sup>c</sup> | 12.13 ± 2.76 <sup>c</sup>   | 22.96 ± 0.76 <sup>c</sup> | 8           |

43 The results indicate mean ± standard deviation of three replicates at two intervals. Values with the  
 44 same letter within columns are not statistically significant ( $P < 0.05$ ). Data were rated as: a (4), ab (3.5),  
 45 b (3), bc (2.5), c (2), cd (1.5), d (1).

46  
 47  
 48  
 49  
 50

51 **Supplementary Table S5.** Specific growth rate and doubling time of quorum quenching bacteria in  
 52 marine broth and mucus.

| Isolates            | Specific growth rate ( $\mu$ ) | Doubling time (ta)        | r <sup>2</sup> | Total score |
|---------------------|--------------------------------|---------------------------|----------------|-------------|
| <b>Marine broth</b> |                                |                           |                |             |
| QQ1                 | 0.291 ± 0.037 <sup>a</sup>     | 0.85 ± 0.06 <sup>a</sup>  | 0.94 ± 0.01    | 8           |
| QQ2                 | 0.177 ± 0.008 <sup>b</sup>     | 1.22 ± 0.08 <sup>b</sup>  | 0.93 ± 0.01    | 6           |
| QQ3                 | 0.184 ± 0.023 <sup>b</sup>     | 1.04 ± 0.06 <sup>ab</sup> | 0.96 ± 0.01    | 6.5         |
| QQ4                 | 0.180 ± 0.014 <sup>b</sup>     | 1.24 ± 0.07 <sup>b</sup>  | 0.95 ± 0.02    | 6           |
| QQ5                 | 0.197 ± 0.011 <sup>b</sup>     | 1.00 ± 0.10 <sup>a</sup>  | 0.95 ± 0.03    | 7           |
| <b>Mucus</b>        |                                |                           |                |             |
| QQ1                 | 0.074 ± 0.006 <sup>b</sup>     | 3.08 ± 0.17 <sup>c</sup>  | 0.96 ± 0.01    | 5           |
| QQ2                 | 0.085 ± 0.005 <sup>b</sup>     | 2.40 ± 0.10 <sup>b</sup>  | 0.93 ± 0.02    | 6           |
| QQ3                 | 0.062 ± 0.003 <sup>b</sup>     | 3.63 ± 0.15 <sup>d</sup>  | 0.94 ± 0.03    | 4           |
| QQ4                 | 0.065 ± 0.009 <sup>b</sup>     | 2.67 ± 0.12 <sup>b</sup>  | 0.92 ± 0.02    | 6           |
| QQ5                 | 0.133 ± 0.015 <sup>a</sup>     | 0.93 ± 0.06 <sup>a</sup>  | 0.94 ± 0.02    | 8           |

53 Values (Mean ± SD, n=3) in the same column sharing identical superscripts are not significantly  
 54 different ( $P < 0.05$ ). Rating to the isolates (for SGR) was performed according to the respective  
 55 differences: a (4), ab (3.5), b (3), bc (2.5), c (2), cd (1.5), d (1).

56  
 57  
 58  
 59  
 60  
 61  
 62

63 **Supplementary Table S6.** Antibiotic resistance of quorum quenching bacteria.

| <b>Antibiotics</b>                         | <b>QQ1</b> | <b>QQ2</b> | <b>QQ3</b> | <b>QQ4</b> | <b>QQ5</b> |
|--------------------------------------------|------------|------------|------------|------------|------------|
| Doxycycline (D, 30 µg)                     | S          | S          | S          | S          | S          |
| Oxytetracycline (OT, 30 µg)                | S          | S          | S          | S          | S          |
| Erythromycin (E, 15 µg)                    | S          | S          | S          | S          | S          |
| Gentamicin (CN, 10 µg)                     | S          | S          | S          | S          | S          |
| Enrofloxacin (ENR, 5 µg)                   | S          | S          | S          | S          | S          |
| Florfenicol (FF, 30 µg)                    | S          | S          | S          | S          | S          |
| Flumequine (UB, 30 µg)                     | S          | S          | S          | S          | S          |
| Oxolinic acid (OA, 2 µg)                   | S          | S          | S          | S          | S          |
| Trimethoprim/Sulfamethoxazole (SXT, 25 µg) | R          | R          | R          | S          | S          |
| Total score                                | 8          | 8          | 8          | 9          | 9          |

64 Susceptible (S): 1, Resistant (R): 0. Susceptibility of the isolates to tested antibiotics was regarded as a  
65 positive score.

66

67
